# Supplementary material
Source: Springer Nature journal article supplement (https://www.springermedizin.de/resource/supplementary/12943_2010_637_MOESM1_ESM.pdf/9554456)

SCP2TR

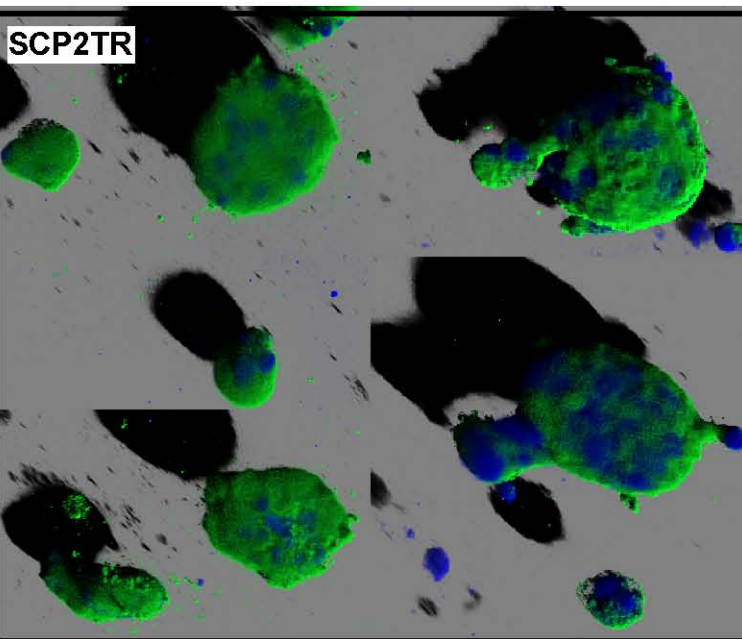

SCP25TR

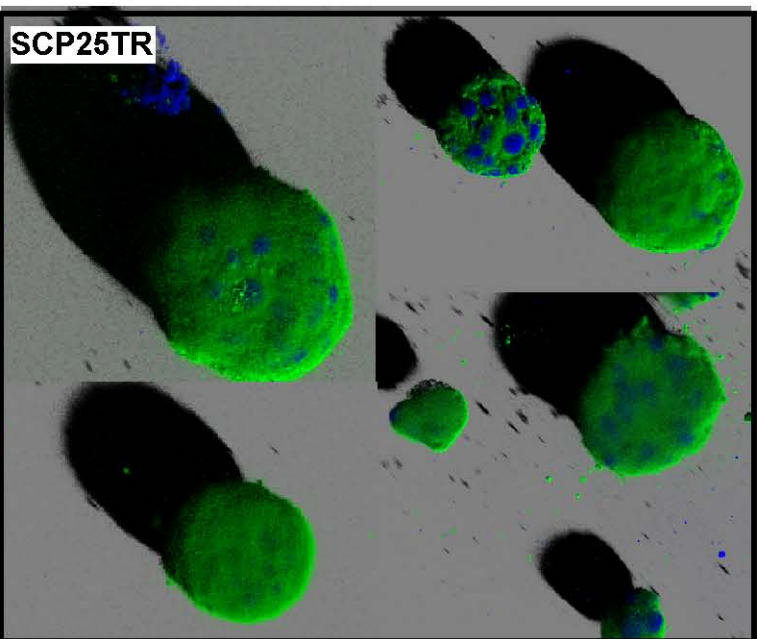

2860TR

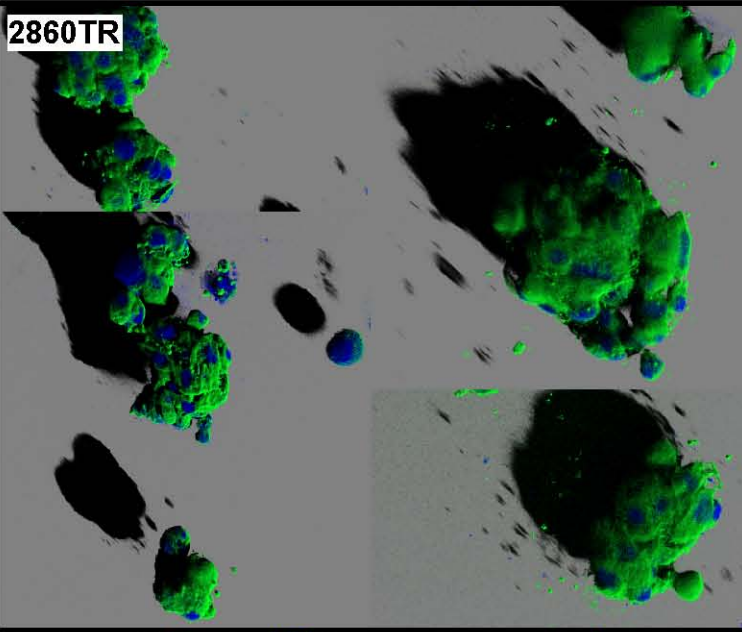

3847TR

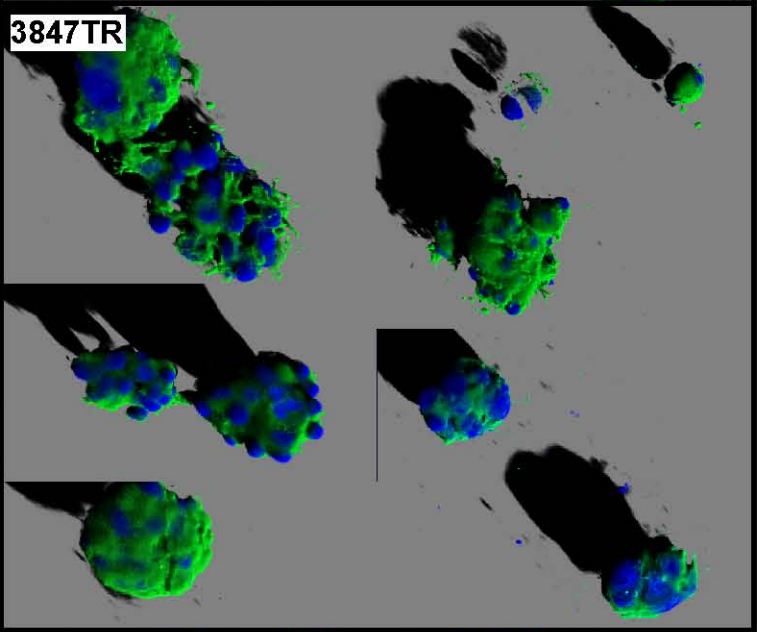

4175TR

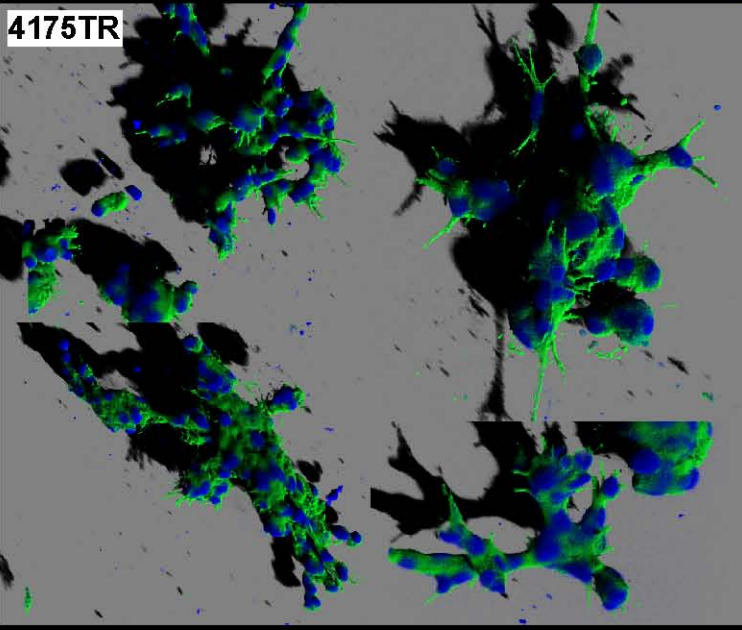

4173

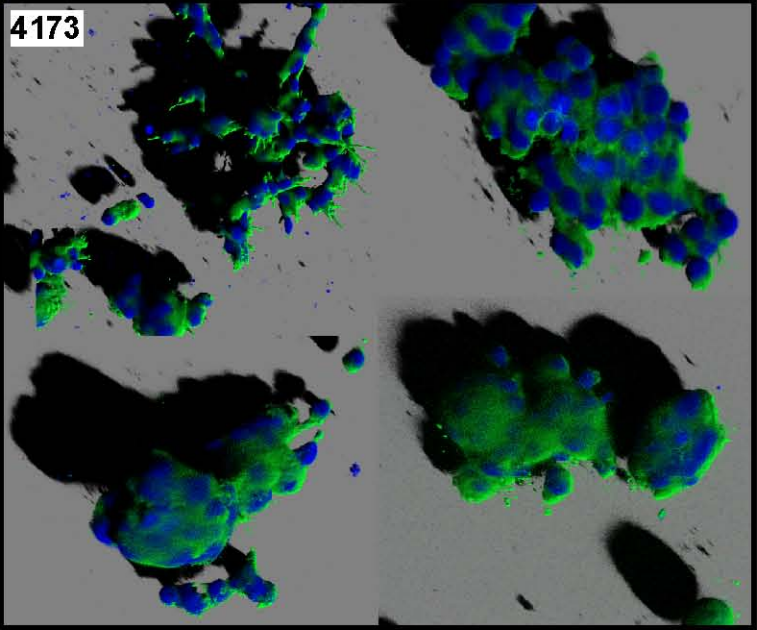

Supplement: MOESM1 [file 9554456]
